# Supplementary material
Source: publisher figshare collection journal article supplement (https://acs.figshare.com/ndownloader/files/24050256)
Supplement: Supplementary file 1 [file 24050256]

Supporting Information for:

**Honey maps the Pb fallout from the 2019 fire at Notre-Dame Cathedral, Paris: a geochemical perspective**

Kate E. Smith<sup>\*,1</sup>, Dominique Weis<sup>\*,1</sup>, Catherine Chauvel<sup>2</sup>, Sibyle Moulin<sup>3</sup>

<sup>1</sup> Pacific Centre for Isotopic and Geochemical Research, Department of Earth, Ocean and Atmospheric Sciences, University of British Columbia, 2020-2207 Main Mall Vancouver, BC, V6T 1Z4, Canada.

<sup>2</sup> Université de Paris, Institut de physique du globe de Paris, CNRS, F-75005 Paris, France.

<sup>3</sup> Beeopic, Route de Vauhallan, 91400 Saclay, France.

\*Correspondence to: [katesmith@eoas.ubc.ca](mailto:katesmith@eoas.ubc.ca), [dweis@eoas.ubc.ca](mailto:dweis@eoas.ubc.ca)

**This PDF file includes:**

Figs. S1 to S3

**Other Supporting Information for this manuscript includes the following:**

Data: Tables S1 to S2

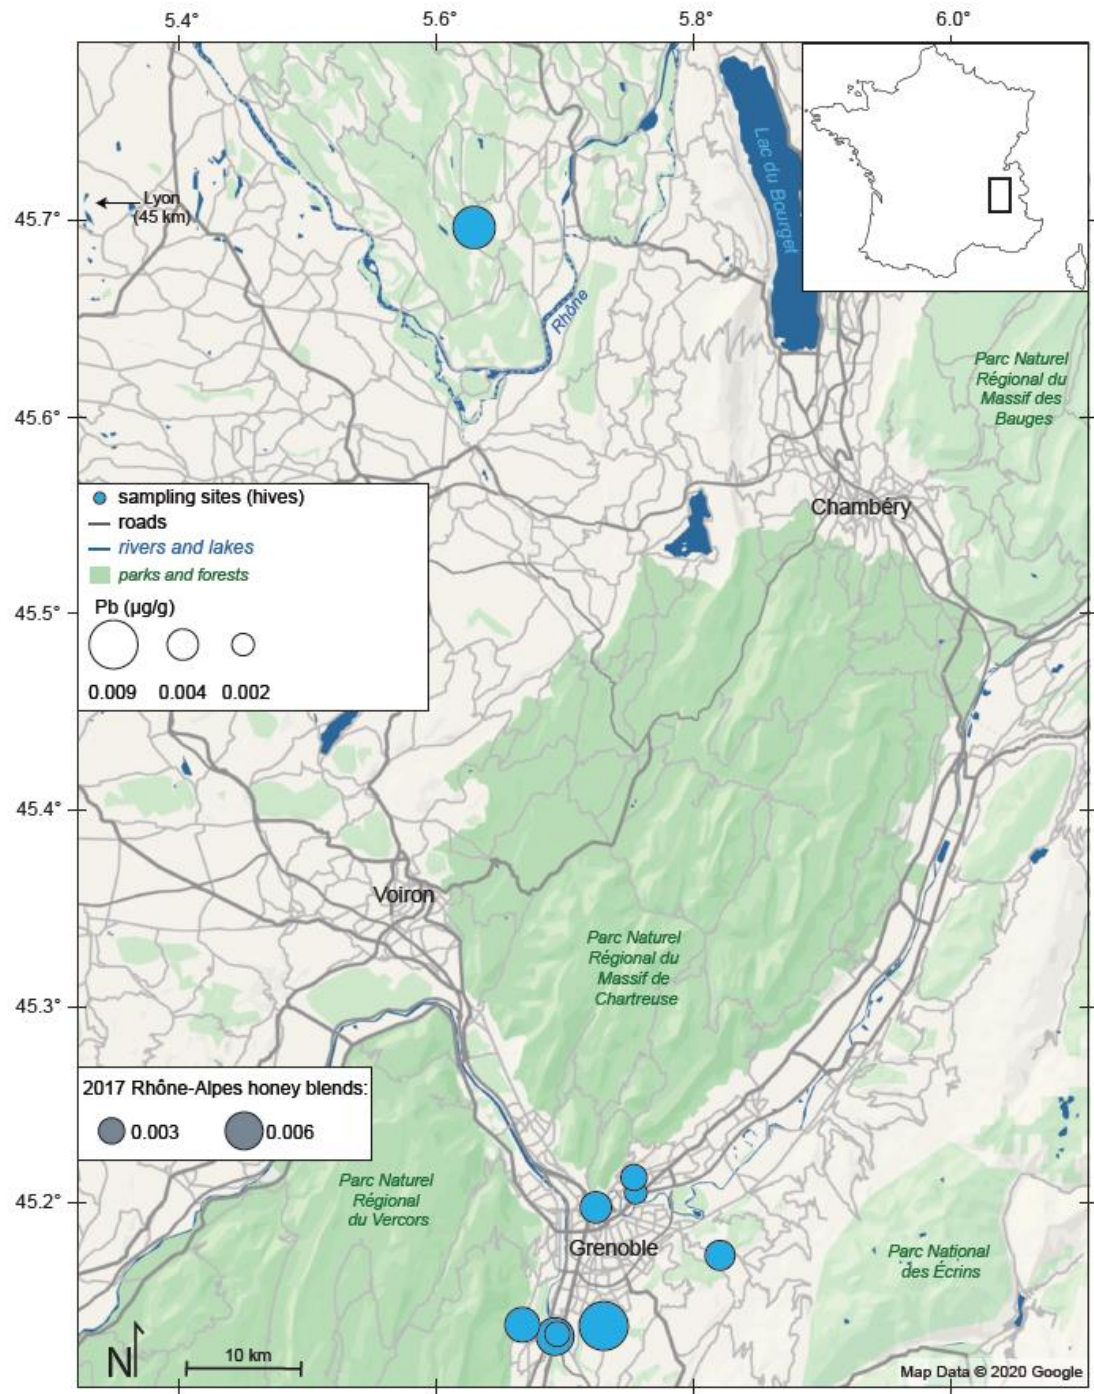

**Fig. S1.** Map of honey sampling sites in the Auvergne-Rhône-Alpes region. Symbol size denotes Pb concentration measured in the honey. Concentrations of local, commercial honey blends are shown in an inset for comparison. All samples were collected or purchased in 2017.

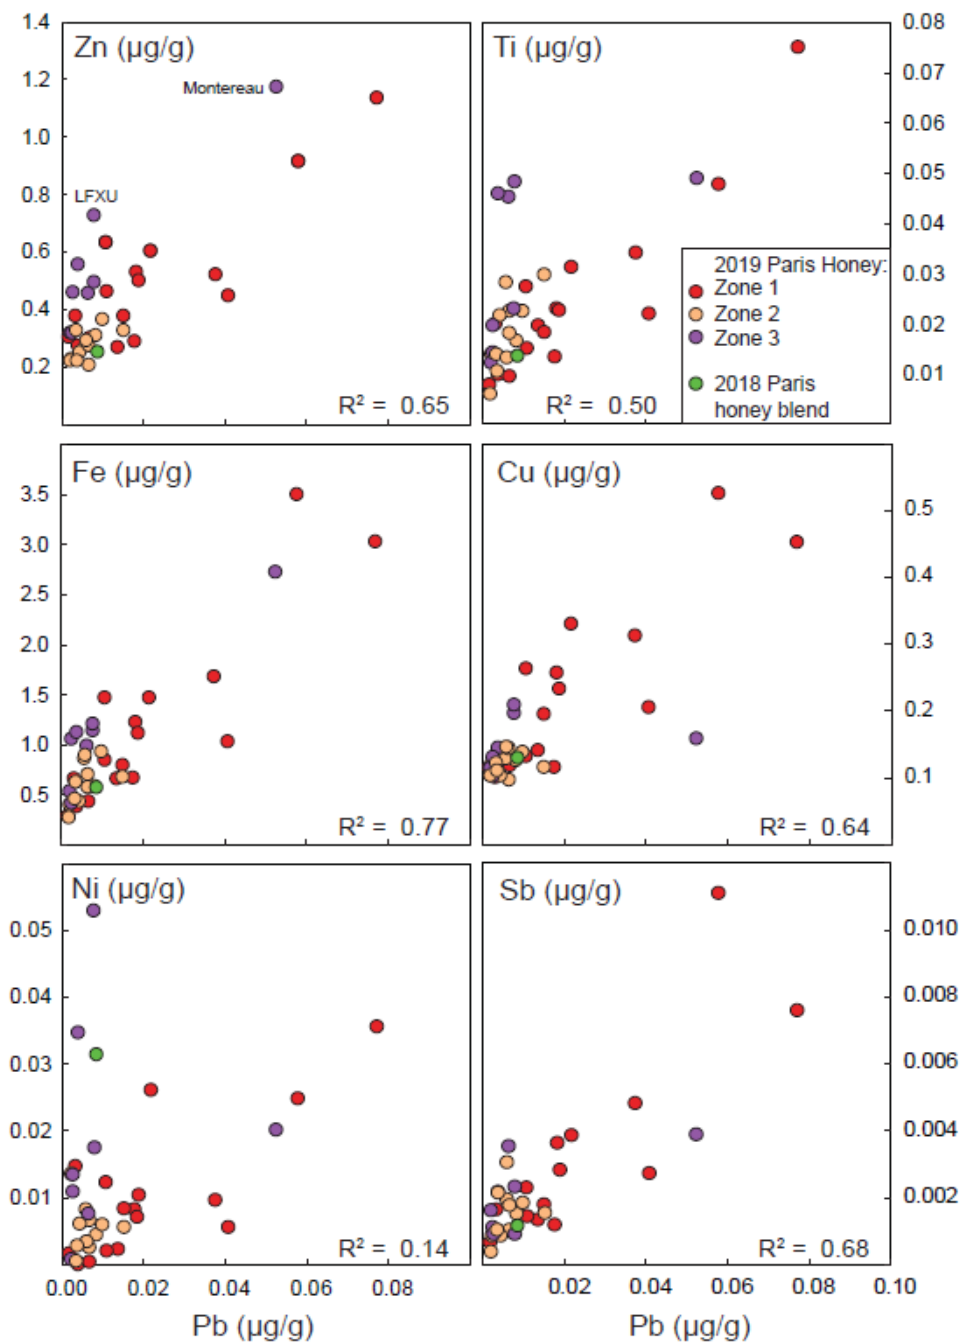

**Fig. S2.** Bivariate concentration plots for selected trace elements (versus Pb) for the Paris honey. All correlations are significant ( $p$ -value < 0.05). Symbol colors correspond to the sampling region/zone. (See Fig. 1 for zone explanations.)

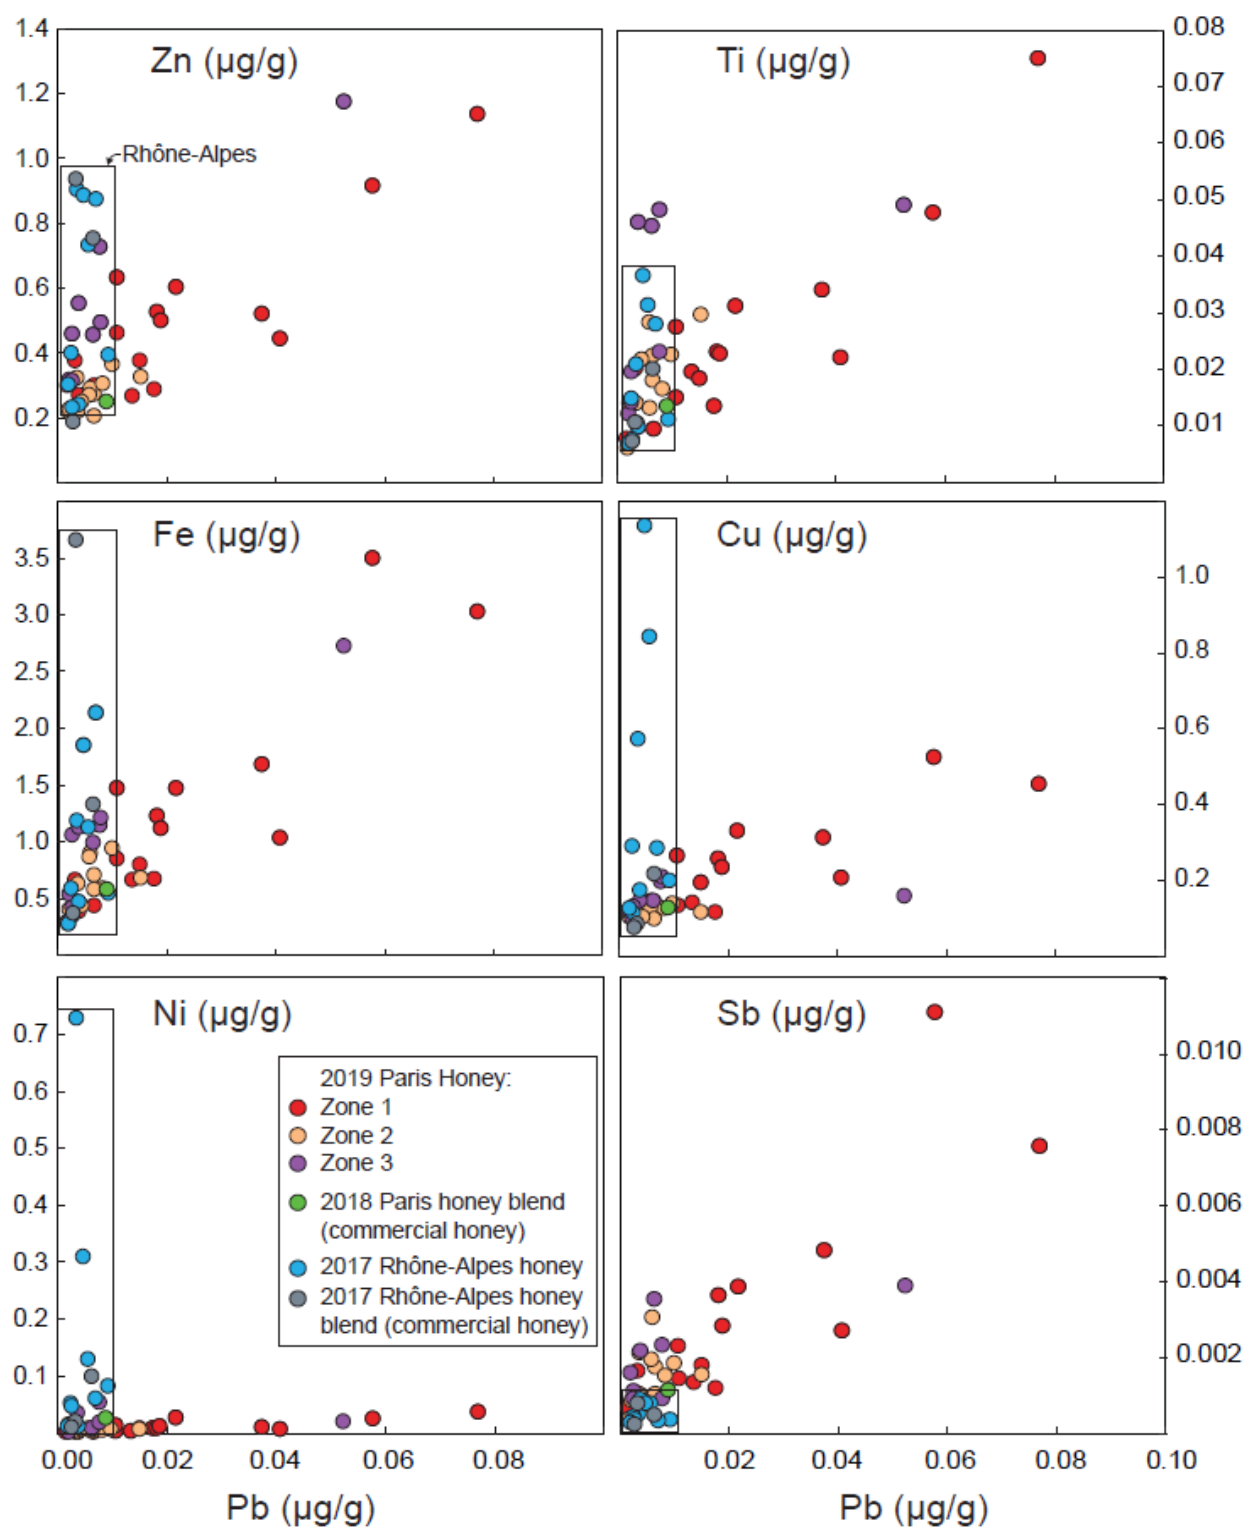

**Fig. S3.** Bivariate concentration plots for selected trace elements (versus Pb) for all honey included in this study (same as Figure S2 with the addition of the Rhône-Alpes honey). Symbol colors correspond to the sampling region/zone. (See Fig. 1 for Parisian zone explanations.)
